# Supplementary material for: Web-Based, Human-Guided, or Computer-Guided Transdiagnostic Cognitive Behavioral Therapy in University Students With Anxiety and Depression: Randomized Controlled Trial
Source: PubMed Central journal article supplement (PMC11222767; doi:10.2196/50503), 2024-06-19
Supplement: mental_v11i1e50503_app2.pdf [file mental_v11i1e50503_app2.pdf]

**Tables S1 + S2 Long-term (12 months) results of linear mixed models for pairwise comparisons of treatment groups for the primary outcome measures**

**Table S1 depression (PHQ-9)**

| <b>Fixed Effects</b> | <b>Comparison</b>                 |                 |                                      |                 |                                     |                 |
|----------------------|-----------------------------------|-----------------|--------------------------------------|-----------------|-------------------------------------|-----------------|
|                      | Human guided versus care as usual |                 | Computer guided versus care as usual |                 | Human guided versus computer guided |                 |
| <b>Parameter</b>     | <b>B (SE)</b>                     | <b>P value</b>  | <b>B (SE)</b>                        | <b>P value</b>  | <b>B (SE)</b>                       | <b>P value</b>  |
| Intercept            | <i>8.34 (0.27)</i>                | <i>&lt;.001</i> | <i>8.34 (0.27)</i>                   | <i>&lt;.001</i> | <i>7.90 (0.28)</i>                  | <i>&lt;.001</i> |
| Time                 | <i>4.03 (0.87)</i>                | <i>&lt;.001</i> | <i>4.03 (0.87)</i>                   | <i>&lt;.001</i> | <i>6.30 (0.83)</i>                  | <i>&lt;.001</i> |
| Condition            | -0.44 (0.38)                      | .25             | -0.22 (0.40)                         | .57             | -0.22 (0.40)                        | .58             |
| Timexcondition       | 2.27 (1.20)                       | .06             | 2.71 (1.22)                          | .03             | -0.44 (1.15)                        | .70             |

*Note. Italicized values are statistically significant (P<.002)*

**Table S2 anxiety (GAD-7)**

| <b>Fixed Effects</b> | <b>Comparison</b>                 |                 |                                      |                 |                                     |                 |
|----------------------|-----------------------------------|-----------------|--------------------------------------|-----------------|-------------------------------------|-----------------|
|                      | Human guided versus care as usual |                 | Computer guided versus care as usual |                 | Human guided versus computer guided |                 |
| <b>Parameter</b>     | <b>B (SE)</b>                     | <b>P value</b>  | <b>B (SE)</b>                        | <b>P value</b>  | <b>B (SE)</b>                       | <b>P value</b>  |
| Intercept            | <i>7.67 (0.24)</i>                | <i>&lt;.001</i> | <i>7.67 (0.24)</i>                   | <i>&lt;.001</i> | <i>6.72 (0.25)</i>                  | <i>&lt;.001</i> |
| Time                 | <i>3.66 (0.74)</i>                | <i>&lt;.001</i> | <i>3.66 (0.74)</i>                   | <i>&lt;.001</i> | <i>5.37 (0.79)</i>                  | <i>&lt;.001</i> |
| Condition            | -0.95 (0.34)                      | <.01            | -0.46 (0.36)                         | .20             | -0.49 (0.36)                        | .17             |
| Timexcondition       | 1.71 (1.06)                       | .11             | 1.88 (1.09)                          | .09             | -0.17 (1.10)                        | .88             |

*Note. Italicized values are statistically significant (P<.002)*
