# Supplementary material for: Web-Based, Human-Guided, or Computer-Guided Transdiagnostic Cognitive Behavioral Therapy in University Students With Anxiety and Depression: Randomized Controlled Trial
Source: PubMed Central journal article supplement (PMC11222767; doi:10.2196/50503), 2024-06-19
Supplement: mental_v11i1e50503_app3.pdf [file mental_v11i1e50503_app3.pdf]

## Tables S1-S3 (Descriptives) and S4-S6 (Analyses) for secondary outcomes

Tables S1-S3 Estimated marginal means and standard errors for the secondary outcome measures at all assessment points for the three treatment conditions (for the primary measures, see main paper)

**Table S1 alcohol use (AUDIT-C)**

|                 | Baseline    | midtreatment | posttreatment | 6 months    | 12 months   |
|-----------------|-------------|--------------|---------------|-------------|-------------|
| Condition       | Mean (SE)   | Mean (SE)    | Mean (SE)     | Mean (SE)   | Mean (SE)   |
| Human guided    | 3.81 (0.14) | 3.56 (0.15)  | 3.51 (0.16)   | 3.54 (0.17) | 3.44 (0.19) |
| Computer guided | 3.63 (0.14) | 3.40 (0.16)  | 3.47 (0.17)   | 3.43 (0.18) | 3.22 (0.19) |
| Care as usual   | 3.70 (0.15) | 3.62 (0.15)  | 3.26 (0.15)   | 3.35 (0.17) | 3.56 (0.17) |

**Table S2 drug use (DAST-10)**

|                 | Baseline    | midtreatment | posttreatment | 6 months    | 12 months   |
|-----------------|-------------|--------------|---------------|-------------|-------------|
| Condition       | Mean (SE)   | Mean (SE)    | Mean (SE)     | Mean (SE)   | Mean (SE)   |
| Human guided    | 0.96 (0.08) | 0.58 (0.08)  | 0.65 (0.08)   | 0.54 (0.09) | 0.54 (0.09) |
| Computer guided | 1.03 (0.08) | 0.66 (0.09)  | 0.64 (0.09)   | 0.58 (0.09) | 0.69 (0.10) |
| Care as usual   | 1.11 (0.08) | 0.62 (0.08)  | 0.68 (0.09)   | 0.60 (0.09) | 0.64 (0.09) |

**Table S3 subjective health (VAS)**

|                 | Baseline        | posttreatment | 6 months     | 12 months    |
|-----------------|-----------------|---------------|--------------|--------------|
| Condition       | Mean (SE)       | Mean (SE)     | Mean (SE)    | Mean (SE)    |
| Human guided    | 64.88<br>(0.99) | 70.22 (1.21)  | 67.76 (1.52) | 68.27 (1.50) |
| Computer guided | 65.47<br>(1.00) | 68.36 (1.33)  | 68.63 (1.50) | 68.33 (1.46) |
| Care as usual   | 64.78<br>(1.00) | 69.34 (1.22)  | 66.86 (1.04) | 66.62 (1.54) |

**Note.** AUDIT-C = Alcohol Use Disorders Identification Test; DAST-10 = Drug Abuse Screening Test

**Tables S4-S6 Long-term (12 months) results of linear mixed models for pairwise comparisons of treatment groups for the secondary outcome measures**

**Table S4 alcohol use (AUDIT-C)**

| <b>Fixed Effects</b> | <b>Comparison</b>                 |                |                                      |                |                                     |                |
|----------------------|-----------------------------------|----------------|--------------------------------------|----------------|-------------------------------------|----------------|
|                      | Human guided versus care as usual |                | Computer guided versus care as usual |                | Human guided versus computer guided |                |
| <b>Parameter</b>     | <b>B (SE)</b>                     | <b>P value</b> | <b>B (SE)</b>                        | <b>P value</b> | <b>B (SE)</b>                       | <b>P value</b> |
| Intercept            | 3.46 (0.13)                       | <.001          | 3.46 (0.13)                          | <.001          | 3.53 (0.14)                         | <.001          |
| Time                 | 0.54 (0.30)                       | .08            | 0.54 (0.30)                          | .08            | 0.66 (0.30)                         | .03            |
| Condition            | 0.07 (0.19)                       | .72            | -0.07 (0.19)                         | .72            | 0.14 (0.20)                         | .48            |
| Timexcondition       | 0.12 (0.43)                       | .78            | 0.11 (0.43)                          | .80            | 0.01 (0.42)                         | .98            |

*Note. Italicized values are statistically significant (P<.002)*

**Table S5 drug use (DAST-10)**

| <b>Fixed Effects</b> | <b>Comparison</b>                 |                 |                                      |                 |                                     |                 |
|----------------------|-----------------------------------|-----------------|--------------------------------------|-----------------|-------------------------------------|-----------------|
|                      | Human guided versus care as usual |                 | Computer guided versus care as usual |                 | Human guided versus computer guided |                 |
| <b>Parameter</b>     | <b>B (SE)</b>                     | <b>P value</b>  | <b>B (SE)</b>                        | <b>P value</b>  | <b>B (SE)</b>                       | <b>P value</b>  |
| Intercept            | <i>0.68 (0.07)</i>                | <i>&lt;.001</i> | <i>0.68 (0.07)</i>                   | <i>&lt;.001</i> | <i>0.61 (0.07)</i>                  | <i>&lt;.001</i> |
| Time                 | <i>0.74 (0.18)</i>                | <i>&lt;.001</i> | <i>0.74 (0.18)</i>                   | <i>&lt;.001</i> | <i>0.72 (0.18)</i>                  | <i>&lt;.001</i> |
| Condition            | -0.07 (0.10)                      | .49             | 0.00 (0.10)                          | .99             | -0.07 (0.10)                        | .49             |
| Timexcondition       | -0.02 (0.24)                      | .92             | -0.16 (0.25)                         | .53             | 0.14 (0.23)                         | .55             |

*Note. Italicized values are statistically significant (P<.002)*

**Table S6 subjective health (EQ-5D VAS)**

| <b>Fixed Effects</b> | <b>Comparison</b>                 |                 |                                      |                 |                                     |                 |
|----------------------|-----------------------------------|-----------------|--------------------------------------|-----------------|-------------------------------------|-----------------|
|                      | Human guided versus care as usual |                 | Computer guided versus care as usual |                 | Human guided versus computer guided |                 |
| <b>Parameter</b>     | <b>B (SE)</b>                     | <b>P value</b>  | <b>B (SE)</b>                        | <b>P value</b>  | <b>B (SE)</b>                       | <b>P value</b>  |
| Intercept            | <i>67.16 (0.85)</i>               | <i>&lt;.001</i> | <i>67.16 (0.85)</i>                  | <i>&lt;.001</i> | <i>68.07 (0.86)</i>                 | <i>&lt;.001</i> |
| Time                 | 3.19 (3.05)                       | .30             | 3.19 (3.05)                          | .30             | 5.86 (2.96)                         | .05             |
| Condition            | 0.91 (1.26)                       | .47             | 0.69 (1.27)                          | .59             | 0.22 (1.20)                         | .86             |
| Timexcondition       | 2.67 (4.22)                       | .53             | 3.12 (4.42)                          | .48             | -0.45 (4.36)                        | .92             |

*Note. Italicized values are statistically significant (P<.002)*
