# Supplementary material for: Web-Based, Human-Guided, or Computer-Guided Transdiagnostic Cognitive Behavioral Therapy in University Students With Anxiety and Depression: Randomized Controlled Trial
Source: PubMed Central journal article supplement (PMC11222767; doi:10.2196/50503), 2024-06-19
Supplement: mental_v11i1e50503_app4.pdf [file mental_v11i1e50503_app4.pdf]

## Tables S1-S4 – Sensitivity analyses

**Table S1** Long-term (6 months) results for depression of linear mixed models for pairwise comparisons of conditions for those with “sufficient eHealth”

| Fixed Effects | Comparison     |              | Human guided versus care as usual |              | Computer guided versus care as usual |              | Human guided versus computer guided |  |
|---------------|----------------|--------------|-----------------------------------|--------------|--------------------------------------|--------------|-------------------------------------|--|
|               | Parameter      | B (SE)       | P value                           | B (SE)       | P value                              | B (SE)       | P value                             |  |
|               | Intercept      | 8.21 (0.29)  | <.001                             | 8.21 (0.29)  | <.001                                | 7.75 (0.33)  | <.001                               |  |
|               | Time           | 4.53 (0.97)  | <.001                             | 4.53 (0.97)  | <.001                                | 7.63 (1.03)  | <.001                               |  |
|               | Condition      | -0.47 (0.44) | .29                               | -0.27 (0.46) | .55                                  | -0.19 (0.48) | .69                                 |  |
|               | Timexcondition | 3.10 (1.40)  | .03                               | 3.06 (1.46)  | .04                                  | 0.04 (1.51)  | .98                                 |  |

Note. *Italicized values are statistically significant (P<.002)*

**Table S2** Long-term (6 months) results for anxiety of linear mixed models for pairwise comparisons of conditions for those with “sufficient eHealth”

| Fixed Effects  | Comparison                        |                |                                      |                |                                     |                |
|----------------|-----------------------------------|----------------|--------------------------------------|----------------|-------------------------------------|----------------|
|                | Human guided versus care as usual |                | Computer guided versus care as usual |                | Human guided versus computer guided |                |
| Parameter      | B (SE)                            | <i>P</i> value | B (SE)                               | <i>P</i> value | B (SE)                              | <i>P</i> value |
| Intercept      | 7.72 (0.26)                       | <.001          | 7.72 (0.26)                          | <.001          | 6.68 (0.29)                         | <.001          |
| Time           | 3.41 (0.82)                       | <.001          | 3.41 (0.82)                          | <.001          | 6.23 (0.95)                         | <.001          |
| Condition      | -1.04 (0.38)                      | <.01           | -0.73 (0.42)                         | .09            | -0.31 (0.44)                        | .48            |
| Timexcondition | 2.82 (1.19)                       | .02            | 2.59 (1.34)                          | .05            | 0.23 (1.41)                         | .87            |

*Note. Italicized values are statistically significant (P<.002)*

**Table S3** Long-term (6 months) results for depression of linear mixed models for pairwise comparisons of conditions for the unimputed dataset

| Fixed Effects  | Comparison                        |                 |                                      |                 |                                     |                 |
|----------------|-----------------------------------|-----------------|--------------------------------------|-----------------|-------------------------------------|-----------------|
|                | Human guided versus care as usual |                 | Computer guided versus care as usual |                 | Human guided versus computer guided |                 |
| Parameter      | B (SE)                            | P value         | B (SE)                               | P value         | B (SE)                              | P value         |
| Intercept      | <i>8.21 (0.22)</i>                | <i>&lt;.001</i> | <i>8.21 (0.22)</i>                   | <i>&lt;.001</i> | <i>7.71 (0.22)</i>                  | <i>&lt;.001</i> |
| Time           | <i>2.88 (0.58)</i>                | <i>&lt;.001</i> | <i>2.88 (0.58)</i>                   | <i>&lt;.001</i> | <i>6.23 (0.58)</i>                  | <i>&lt;.001</i> |
| Condition      | -0.49 (0.31)                      | .11             | -0.06 (0.31)                         | .85             | -0.43 (0.31)                        | .16             |
| Timexcondition | <i>3.35 (0.82)</i>                | <i>&lt;.001</i> | <i>2.69 (0.82)</i>                   | <i>.&lt;.01</i> | <i>0.67 (0.82)</i>                  | <i>.42</i>      |

Note. *Italicized values are statistically significant (P<.002)*

**Table S4** Long-term (6 months) results for anxiety of linear mixed models for pairwise comparisons of conditions for the unimputed dataset

| Fixed Effects    | Comparison                        |                |                                      |                |                                     |                |
|------------------|-----------------------------------|----------------|--------------------------------------|----------------|-------------------------------------|----------------|
|                  | Human guided versus care as usual |                | Computer guided versus care as usual |                | Human guided versus computer guided |                |
| Parameter        | B (SE)                            | <i>P</i> value | B (SE)                               | <i>P</i> value | B (SE)                              | <i>P</i> value |
| Intercept        | 7.78 (0.20)                       | <.001          | 7.78 (0.20)                          | <.001          | 6.67 (0.20)                         | <.001          |
| Time             | 1.71 (0.51)                       | <.001          | 1.71 (0.51)                          | <.001          | 5.25 (0.51)                         | <.001          |
| Condition        | -1.11 (0.28)                      | <.001          | -0.56 (0.28)                         | .50            | -0.55 (0.28)                        | .53            |
| Time x condition | 3.54 (0.72)                       | <.001          | 2.69 (0.72)                          | <.001          | 0.84 (0.72)                         | .24            |

*Note. Italicized values are statistically significant (P<.002)*
